# Supplementary material for: The adsorption properties and mechanisms of magnetic carbon–silicon composites in situ prepared from coal gasification fine slag
Source: Royal Society of Chemistry journal article supplement (doi:10.1039/d3ra05916b), 2024-01-01
Supplement: d3ra05916b1.pdf [file d3ra05916b1.pdf]

**Adsorption on properties and mechanisms of magnetic carbon-  
silicon composites in situ prepared from coal gasification fine  
slag**

Chenxu Sun, Haoqi Pan, Tingting Shen\*, Jing Sun\*, Shaocang He, Tianpeng Li,

Xuqian Lu

*School of Environmental Science and Engineering, Qilu University of Technology  
(Shandong Academy of Sciences), Jinan 250353, P. R. China*

\* Corresponding author.

E-mail address: [shentingting@qlu.edu.cn](mailto:shentingting@qlu.edu.cn) (T. Shen).

[sunjing77@qlu.edu.cn](mailto:sunjing77@qlu.edu.cn) (J. Sun);

## **Texts**

### **Text S1. Characterization methods**

The elemental composition of the original CGFS was analyzed by an inductively coupled plasma and optical emission spectrum (ICP-OES/MS, Agilent 5110 (OES), America) analyzed. The concentration of RhB was determined using a UV-visible spectrophotometer at 554 nm (UV-Vis DRS, UV-2550, Shimadzu, Kyushu, Japan). The crystal lattice structure and crystallinity of the material were analyzed by X-ray Diffraction (XRD, Rigaku smartlab SE, Japan). Radiation waves were Cu-K $\alpha$  ( $\lambda=1.5418$  A) at 40 kV, 40 mA, deflection angle  $2\theta=5-80^\circ$ . The surface morphology of the samples was observed by scanning electron microscopy (SEM, Phenom pure plus, Netherlands/TESCAN MIRA LMS, Czech), while the elemental composition of the samples was analyzed by EDS. The pore structure of the samples was characterized by the N<sub>2</sub> adsorption-desorption test using a rapid specific surface area and porosity analyzer (BET, Quantachrome Autosorb-iQ, America) at 77K, to obtain their specific surface area and pore size distribution. Surface chemical compositions were analyzed by X-ray photoelectron spectroscopy (XPS, Thermo Scientific ESCALAB Xi+, America). Thermal gravimetric analysis (TGA, Rigaku TG-DTA8122, Japan) for analyzing material composition, thermal stability, decomposition processes of substances, etc. The vibrating sample magnetometer (VSM, LakeShore 7404, America) was used to test the hysteresis lines on the samples at 25°C.

## Tables

**Table S1. Levels of factors used for Box-Behnken experimental design.**

| Coded | Factors                             | Levels |      |      |
|-------|-------------------------------------|--------|------|------|
|       |                                     | -1     | 0    | +1   |
| A     | Temperature (°C)                    | 20     | 40   | 60   |
| B     | Fe <sup>3+</sup> : Fe <sup>2+</sup> | 0.5    | 1    | 1.5  |
| C     | pH                                  | 9.0    | 10.0 | 11.0 |

Noted: The three levels of factor B, namely 0.5, 1, and 1.5, correspond to the molar ratio of Fe<sup>3+</sup>: Fe<sup>2+</sup> as 2:1, 1:1, and 1:2 respectively.

**Table S2. Actual and predict RhB Removal efficiency from the experimental design matrix with Fe-HH-CGFS**

| Run | Coded |    |    | Removal Efficiency (%) |                 |
|-----|-------|----|----|------------------------|-----------------|
|     | A     | B  | C  | Actual value           | Predicted value |
| 1   | 0     | -1 | -1 | 94.58                  | 94.70           |
| 2   | -1    | 0  | -1 | 93.89                  | 93.95           |
| 3   | -1    | 1  | 0  | 78.07                  | 78.60           |
| 4   | 1     | -1 | 0  | 91.76                  | 91.23           |
| 5   | 1     | 1  | 0  | 78.93                  | 79.10           |
| 6   | -1    | -1 | 0  | 92.32                  | 92.15           |
| 7   | 0     | 1  | -1 | 80.21                  | 79.63           |
| 8   | 0     | 0  | 0  | 97.47                  | 96.65           |
| 9   | -1    | 0  | 1  | 93.11                  | 92.70           |
| 10  | 0     | 0  | 0  | 96.46                  | 96.65           |
| 11  | 0     | 0  | 0  | 98.11                  | 96.65           |
| 12  | 0     | 1  | 1  | 81.64                  | 81.52           |
| 13  | 0     | 0  | 0  | 96.15                  | 96.65           |
| 14  | 1     | 0  | 1  | 93.47                  | 93.41           |
| 15  | 0     | 0  | 0  | 95.05                  | 96.65           |
| 16  | 0     | -1 | 1  | 91.55                  | 92.13           |
| 17  | 1     | 0  | -1 | 92.42                  | 92.83           |

**Table S3. ANOVA results for the response surface quadratic model on the RhB removal.**

| Source                               | Sum of Squares | df | Mean Square             | F-value | p-value  |                 |
|--------------------------------------|----------------|----|-------------------------|---------|----------|-----------------|
| Model                                | 710.91         | 9  | 78.99                   | 75.58   | < 0.0001 | significant     |
| A-Temperature                        | 0.082          | 1  | 0.082                   | 0.0785  | 0.7875   |                 |
| B-Fe <sup>3+</sup> :Fe <sup>2+</sup> | 329.73         | 1  | 329.73                  | 315.5   | < 0.0001 |                 |
| C-pH                                 | 0.2211         | 1  | 0.2211                  | 0.2116  | 0.6595   |                 |
| AB                                   | 0.5041         | 1  | 0.5041                  | 0.4823  | 0.5097   |                 |
| AC                                   | 0.8372         | 1  | 0.8372                  | 0.8011  | 0.4005   |                 |
| BC                                   | 4.97           | 1  | 4.97                    | 4.76    | 0.0655   |                 |
| A <sup>2</sup>                       | 27.92          | 1  | 27.92                   | 26.72   | 0.0013   |                 |
| B <sup>2</sup>                       | 326.27         | 1  | 326.27                  | 312.19  | < 0.0001 |                 |
| C <sup>2</sup>                       | 3.041          | 1  | 3.04                    | 2.91    | 0.1317   |                 |
| Residual                             | 7.32           | 7  | 1.05                    |         |          |                 |
| Lack of Fit                          | 1.67           | 3  | 0.5552                  | 0.3931  | 0.7655   | not significant |
| Pure Error                           | 5.65           | 4  | 1.41                    |         |          |                 |
| Cor Total                            | 718.22         | 16 |                         |         |          |                 |
| Std. Dev.                            | 1.02           |    | R <sup>2</sup>          | 0.9898  |          |                 |
| Mean                                 | 90.89          |    | Adjusted R <sup>2</sup> | 0.9767  |          |                 |
| C.V. %                               | 1.12           |    | Adeq Precision          | 23.0231 |          |                 |
